# Supplementary material for: Prognostic role of FUT8 expression in relation to p53 status in stage II and III colorectal cancer
Source: PubMed Central journal article supplement (PMC6033451; doi:10.1371/journal.pone.0200315), 2018-07-05

**S1 Fig. Immunohistochemistry for FUT8 in cultured colorectal cancer cell lines**

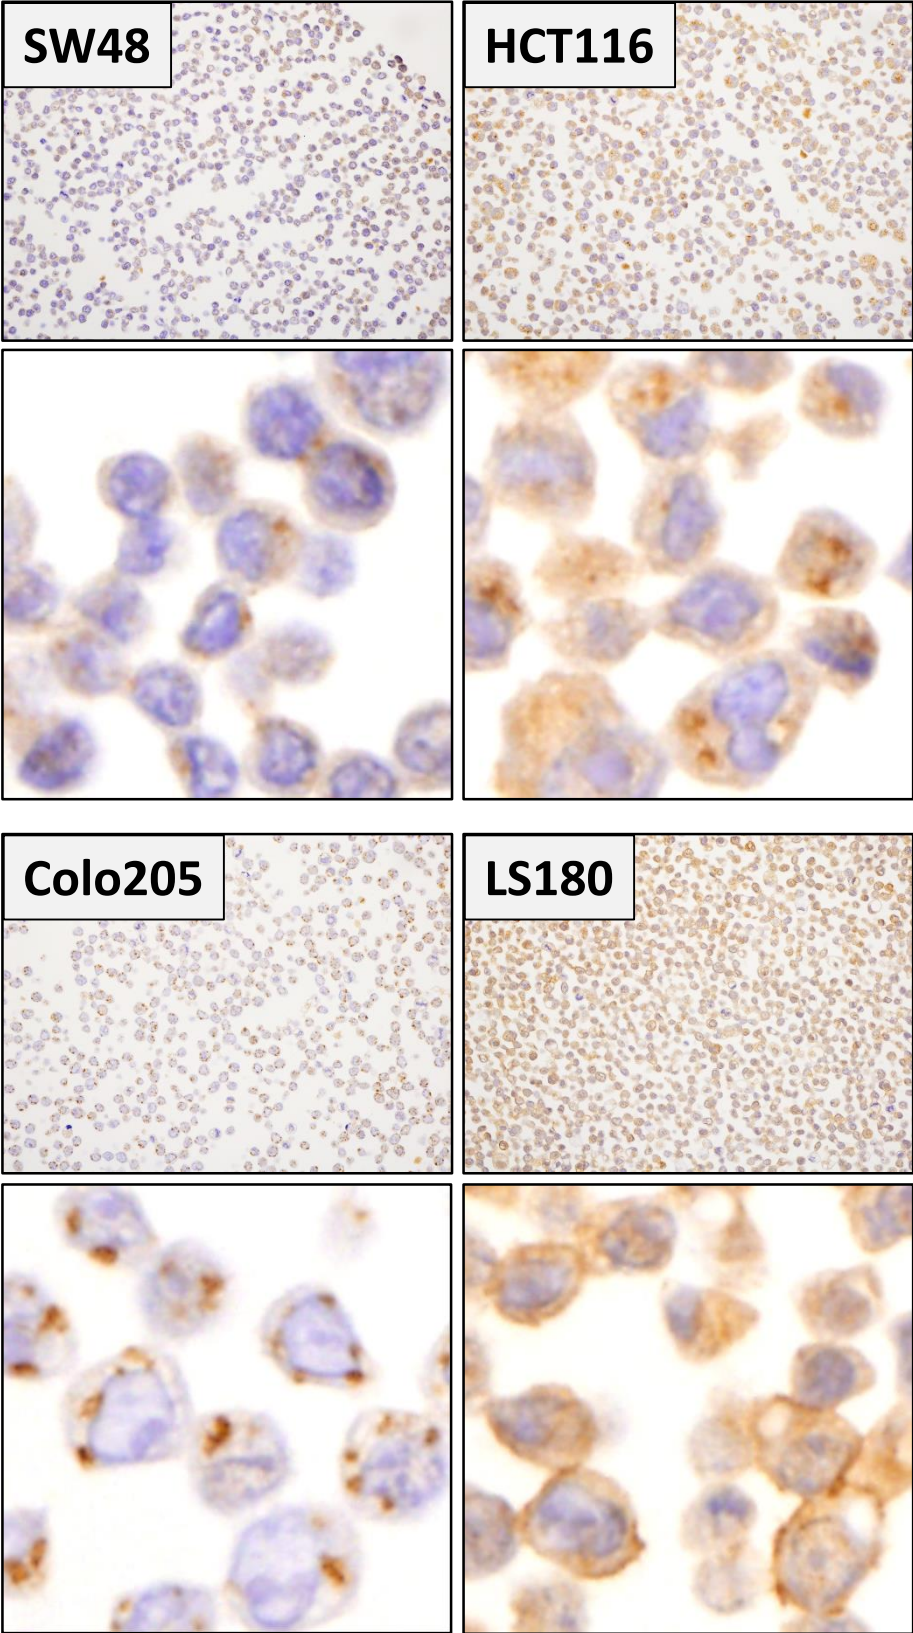

Supplement: pone.0200315.s002.pdf [file pone.0200315.s002.pdf]
